# Supplementary material for: Delineating the Tnt1 Insertion Landscape of the Model Legume Medicago truncatula cv. R108 at the Hi-C Resolution Using a Chromosome-Length Genome Assembly
Source: MDPI journal article supplement (doi:10.3390/ijms22094326), 2021-04-21
Supplement: s1 [file s1]

# Supplementary material

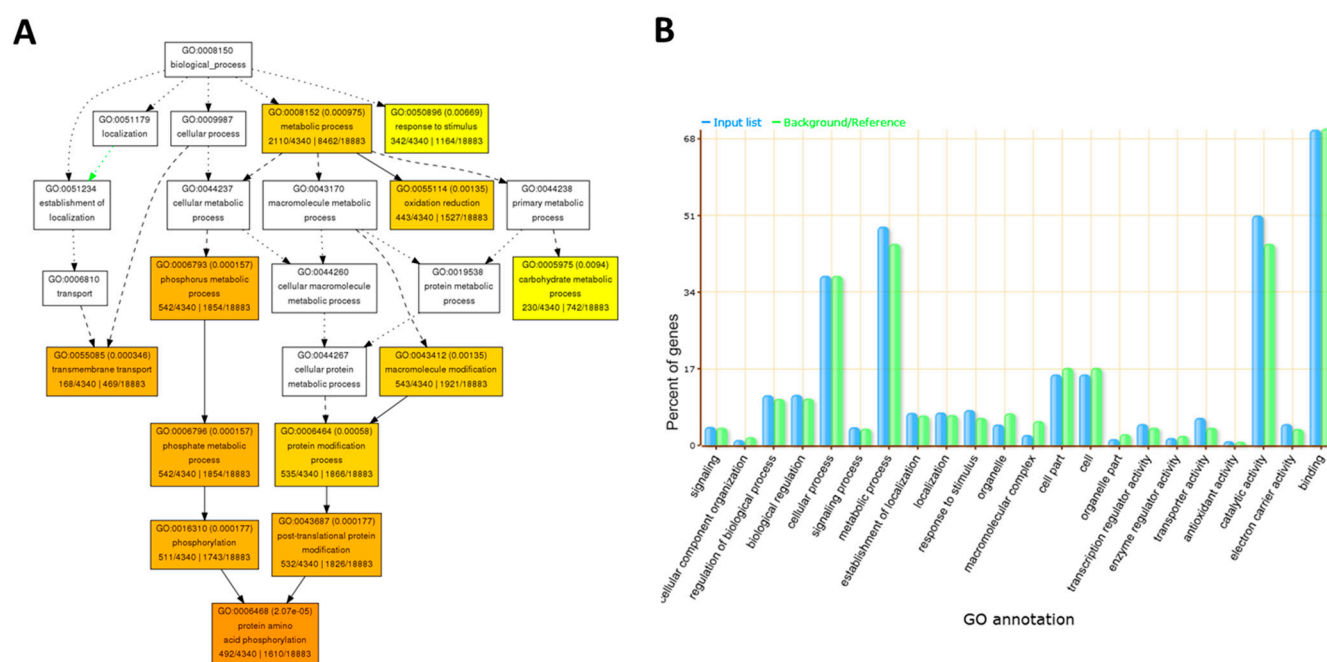

**Figure S1.** Pathway analysis and GO annotation of genes with *Tnt1* insertions. a) AgriGO analysis of genes specific for biological processes. Frequently inserted genes fall into the following five pathways: stress, signaling, secondary metabolism, transport, and nucleotide metabolism. b) Significant GO terms under biological processes are: response to stress, response to stimulus, defense response, protein phosphorylation, and transmembrane transport. Significant GO terms under molecular functions are: ATP binding, active transmembrane transporter activity, protein tyrosine kinase activity, and transporter activity.
